# Supplementary material for: Microfluidic depletion of endothelial cells, smooth muscle cells, and fibroblasts from heterogeneous suspensions
Source: Royal Society of Chemistry journal article supplement (doi:10.1039/b715707j), 2008-01-01
Supplement: b715707j.pdf [file b715707j.pdf]

**Supplementary Data**

**Plouffe et al, Lab on a Chip Manuscript No. B715707J**

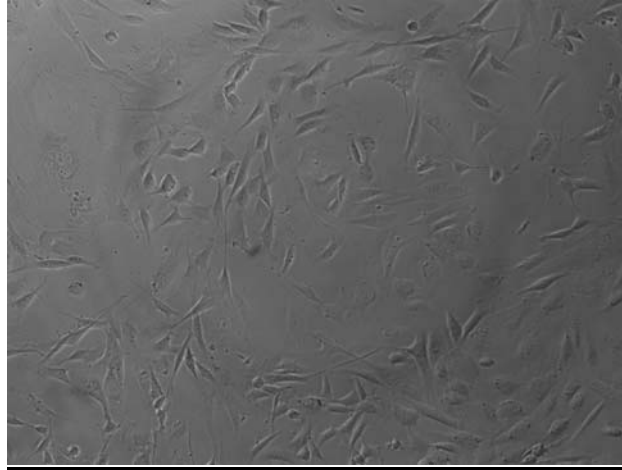

**Figure S1.** Representative brightfield micrograph of cells spreading normally after 24 hours in culture following output from a 3-stage separation.

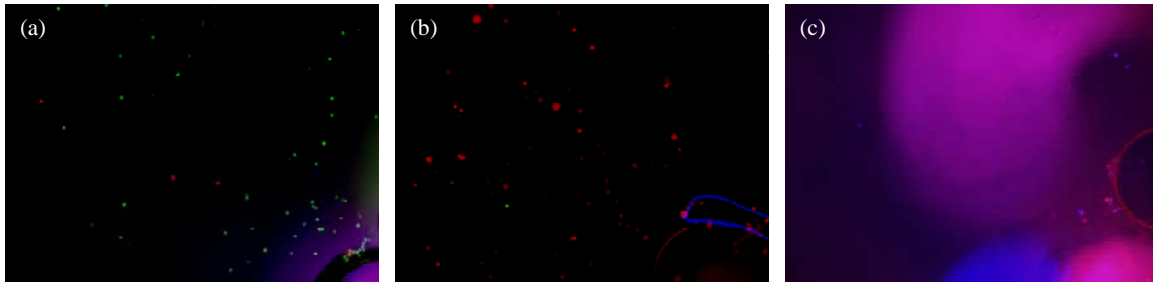

**Figure S2.** Fluorescence micrographs of entry ports of devices coated with (a) REDV, (b) VAPG, and (c) RGDS in a 3-stage arrangement. In all images the entry port is at the lower right hand corner of the images. The area covered by each image is 1.3 mm  $\times$  1.7 mm and the magnification is 10 $\times$ .

**Table S1.** Stage-wise Output Cell Counts for 37 °C Experiment.

|                     | Output Cell counts ( $\times 10^4$ cells) |                |                |                |
|---------------------|-------------------------------------------|----------------|----------------|----------------|
|                     | Input                                     | REDV (Stage 1) | VAPG (Stage 2) | RGDS (Stage 3) |
| Endothelial Cells   | 16.7                                      | 4.92           | 3.5            | 0.63           |
| Smooth Muscle Cells | 16.7                                      | 13.5           | 5.34           | 1.06           |
| Fibroblasts         | 16.7                                      | 14.8           | 10.7           | 0.93           |
